# Supplementary material for: Trans-regulatory changes underpin the evolution of the Drosophila immune response
Source: PubMed Central journal article supplement (PMC9671443; doi:10.1371/journal.pgen.1010453), 2022-11-07
Supplement: pgen.1010453.s012.pdf [file pgen.1010453.s012.pdf]

| Gene        | PrimerID         | Sequence (5' to 3')    | Product length (bp) | Primer efficiency (%) |
|-------------|------------------|------------------------|---------------------|-----------------------|
| BomBc1      | BomBc1_p4_fw     | CCGGATTGGACCATCGAGAG   | 111                 | 91                    |
|             | BomBc1_p4_rv     | GAAAACGTGGTCGTTCGGTG   |                     |                       |
| Indy        | Indy_p7_fw       | GGGGAAGTCCATCTGTTCGG   | 83                  | 104                   |
|             | Indy_p7_rv       | TCATCGGAAGTCCACCAAT    |                     |                       |
| CG8850      | CG8850_p6_fw     | CCCAGATAATCCAGCCAGCC   | 98                  | 99                    |
|             | CG8850_p6_rv     | CCTGGTCTCGTCTACATGC    |                     |                       |
| CG16772     | CG16772_p18_fw   | CCCACTTCCAAAGATGCGGA   | 86                  | 100                   |
|             | CG16772_p18_rv   | TAGGGCGAGTACGGTGATCT   |                     |                       |
| BomBc3      | BomBc3_p5_fw     | ATCCCCTGGCGATGGTAATG   | 83                  | 94                    |
|             | BomBc3_p5_rv     | CACCCCTCCGGTAAATGGTG   |                     |                       |
| FBgn0196692 | 0196692_p15_fw   | TGAGTTCCTCCAGCCGATTG   | 113                 | 102                   |
|             | 0196692_p15_rv   | AGGCCAGCTCGAGATCAT     |                     |                       |
| Mtk         | Mtk_p1_fw        | CGATTTTTCTGGCCCTGCTG   | 84                  | 100                   |
|             | Mtk_p1_rv        | CGAAAATGGGTCCCTGGTGA   |                     |                       |
| edin        | edin_p10_fw      | AGGCCAGTGTTCAGTACAACC  | 120                 | 95                    |
|             | edin_p10_rv      | TGCCGCCTTCGTAGTTGTT    |                     |                       |
| TotX        | TotX_p8_fw       | GATGGTGTACCACCTCAAGGA  | 117                 | 94                    |
|             | TotX_p8_rv       | GGATTGCCCTTCCTCCCTTT   |                     |                       |
| BomS1       | BomS1_p2_fw      | TTCCACTGTGCCCCGATCC    | 76                  | 99                    |
|             | BomS1_p2_rv      | TACTTGCCACCGTGGACATTG  |                     |                       |
| CecA1       | Dsim_CecA1_p1_fw | TCTTCGTTTTTCGTCGCTCTCA | 70                  | 100                   |
|             | Dsim_CecA1_p1_rv | ATTTTCTTCAGCCAGCCAGC   |                     |                       |
| CecC        | Dsim_CecC_p5_fw  | CGCATTGGCCAGCACAC      | 70                  | 96                    |
|             | Dsim_CecC_p5_rv  | CCACATTGGCGGCCTGTT     |                     |                       |
| GD19384     | GD19384_p3_fw    | CGCCCTTTCATCTGGTCTCA   | 99                  | 97                    |
|             | GD19384_p3_rv    | CGAACCTCCTTGGACGACAA   |                     |                       |

**Table S1. Primer sequences used for both quantitative PCR and amplicon sequencing.**
