# Supplementary material for: Trans-regulatory changes underpin the evolution of the Drosophila immune response
Source: PubMed Central journal article supplement (PMC9671443; doi:10.1371/journal.pgen.1010453), 2022-11-07
Supplement: pgen.1010453.s013.pdf [file pgen.1010453.s013.pdf]

A

| Transcription factor | Control                                  |           |           |           |         | Wasp                                     |           |           |           |         | Response                                 |           |           |           |         |
|----------------------|------------------------------------------|-----------|-----------|-----------|---------|------------------------------------------|-----------|-----------|-----------|---------|------------------------------------------|-----------|-----------|-----------|---------|
|                      | <i>Trans diverged D. simulans</i> biased |           | Other     |           |         | <i>Trans diverged D. simulans</i> biased |           | Other     |           |         | <i>Trans diverged D. simulans</i> biased |           | Other     |           |         |
|                      | Motif / +                                | Motif / - | Motif / + | Motif / - | P value | Motif / +                                | Motif / - | Motif / + | Motif / - | P value | Motif / +                                | Motif / - | Motif / + | Motif / - | P value |
| Relish               | 6                                        | 30        | 63        | 432       | 0.67    | 6                                        | 63        | 44        | 418       | 1       | 0                                        | 69        | 9         | 453       | 0.50    |
| Dif                  | 12                                       | 149       | 24        | 346       | 0.83    | 21                                       | 29        | 140       | 341       | 0.08    | 1                                        | 8         | 160       | 362       | 0.37    |
| STAT                 | 8                                        | 28        | 76        | 419       | 0.39    | 11                                       | 39        | 73        | 408       | 0.29    | 1                                        | 8         | 83        | 439       | 1       |
| Serpent              | 6                                        | 30        | 94        | 401       | 0.90    | 7                                        | 43        | 93        | 388       | 0.47    | 0                                        | 9         | 100       | 422       | 0.30    |
| Dorsal               | 1                                        | 35        | 37        | 458       | 0.47    | 2                                        | 48        | 36        | 445       | 0.53    | 1                                        | 8         | 37        | 485       | 1       |
| CrebA                | 5                                        | 31        | 93        | 402       | 0.61    | 8                                        | 42        | 90        | 391       | 0.78    | 2                                        | 7         | 96        | 426       | 1       |

B

| Transcription factor | Control                                   |           |           |           |         | Wasp                                      |           |           |           |         | Response                                  |           |           |           |         |
|----------------------|-------------------------------------------|-----------|-----------|-----------|---------|-------------------------------------------|-----------|-----------|-----------|---------|-------------------------------------------|-----------|-----------|-----------|---------|
|                      | <i>Trans diverged D. sechellia</i> biased |           | Other     |           |         | <i>Trans diverged D. sechellia</i> biased |           | Other     |           |         | <i>Trans diverged D. sechellia</i> biased |           | Other     |           |         |
|                      | Motif / +                                 | Motif / - | Motif / + | Motif / - | P value | Motif / +                                 | Motif / - | Motif / + | Motif / - | P value | Motif / +                                 | Motif / - | Motif / + | Motif / - | P value |
| Relish               | 2                                         | 45        | 67        | 417       | 0.10    | 15                                        | 120       | 54        | 342       | 0.54    | 3                                         | 14        | 66        | 448       | 0.83    |
| Dif                  | 17                                        | 30        | 144       | 340       | 0.45    | 38                                        | 97        | 123       | 273       | 0.60    | 6                                         | 11        | 155       | 359       | 0.85    |
| STAT                 | 9                                         | 38        | 75        | 409       | 0.66    | 21                                        | 114       | 63        | 333       | 1       | 4                                         | 13        | 80        | 434       | 0.59    |
| Serpent              | 12                                        | 35        | 88        | 396       | 0.30    | 23                                        | 112       | 77        | 319       | 0.62    | 3                                         | 14        | 97        | 417       | 1       |
| Dorsal               | 4                                         | 43        | 34        | 450       | 0.94    | 11                                        | 124       | 27        | 369       | 0.75    | 2                                         | 15        | 36        | 478       | 0.79    |
| CrebA                | 8                                         | 39        | 90        | 394       | 0.95    | 21                                        | 114       | 77        | 319       | 0.38    | 2                                         | 15        | 96        | 418       | 0.69    |

C

| Transcription factor | Control             |           |                          |           |         | Wasp                |           |                          |           |         |
|----------------------|---------------------|-----------|--------------------------|-----------|---------|---------------------|-----------|--------------------------|-----------|---------|
|                      | <i>Cis</i> diverged |           | No <i>cis</i> divergence |           |         | <i>cis</i> diverged |           | No <i>cis</i> divergence |           |         |
|                      | Motif / +           | Motif / - | Motif / +                | Motif / - | P value | Motif / +           | Motif / - | Motif / +                | Motif / - | P value |
| Relish               | 14                  | 230       | 19                       | 268       | 0.8108  | 16                  | 238       | 17                       | 260       | 1       |
| Dif                  | 18                  | 226       | 20                       | 267       | 0.9896  | 16                  | 238       | 22                       | 255       | 0.5719  |
| STAT                 | 13                  | 231       | 15                       | 272       | 1       | 13                  | 241       | 15                       | 262       | 1       |
| Serpent              | 19                  | 225       | 26                       | 261       | 0.7126  | 19                  | 235       | 26                       | 251       | 0.5275  |
| Dorsal               | 6                   | 238       | 16                       | 271       | 0.1148  | 8                   | 246       | 14                       | 263       | 0.3777  |
| CrebA                | 8                   | 236       | 21                       | 266       | 0.0644  | 8                   | 246       | 21                       | 256       | 0.03999 |

**Table S2. Number of *cis* or *trans* diverged immune responsive genes in the fat body, with or without transcription factor binding site motifs.** Immune-responsive genes in the fat body were classified as to whether they had motifs associated with the binding of six transcription factors. In (A) and (B) Motif/+ genes had the motif in both *D. sechellia* and *D. simulans*. In (C) Motif+ genes had the motif in just one of these species but not the other. These genes in turn were classified as to whether they had diverged in *cis* or *trans* in control or immune-challenged conditions, of if the response to infection had been changed in *trans*. The *P* value is from a chi-squared test.
