# Supplementary material for: Trans-regulatory changes underpin the evolution of the Drosophila immune response
Source: PubMed Central journal article supplement (PMC9671443; doi:10.1371/journal.pgen.1010453), 2022-11-07
Supplement: pgen.1010453.s014.pdf [file pgen.1010453.s014.pdf]

Trimmed Raw RNA reads

Aligned to *Sz49* genome

Aligned to *DenisNF100* genome

Unaligned to *Sz49* genome

Unaligned to *DenisNF100* genome

Aligned to *D. simulans*  
reference genome

Aligned to *D. sechellia*  
reference genome

Unaligned to *Sz49* or *D. simulans*  
reference genome

Unaligned to *DenisNF100* or  
*D. sechellia* reference genome

Aligned to *DenisNF100*  
genome

Aligned to *Sz49* genome

Uniquely aligned  
to  
*DenisNF100*  
genome

Unaligned to  
either  
*D. simulans*  
genomes or  
*DennisNF100*  
genome

Unaligned to  
either  
*D. sechellia*  
genomes or  
*Sz49* genome

Uniquely aligned  
to  
*Sz49* genome

Aligned to *D. sechellia*  
reference genome

Aligned to *D. simulans*  
reference genome

Uniquely aligned to  
*D. sechellia* reference genome

Uniquely aligned to  
*D. simulans* reference genome

*D. sechellia* allele-specific RNA reads

*D. simulans* allele-specific RNA reads
