# Supplementary material for: Trans-regulatory changes underpin the evolution of the Drosophila immune response
Source: PubMed Central journal article supplement (PMC9671443; doi:10.1371/journal.pgen.1010453), 2022-11-07

A

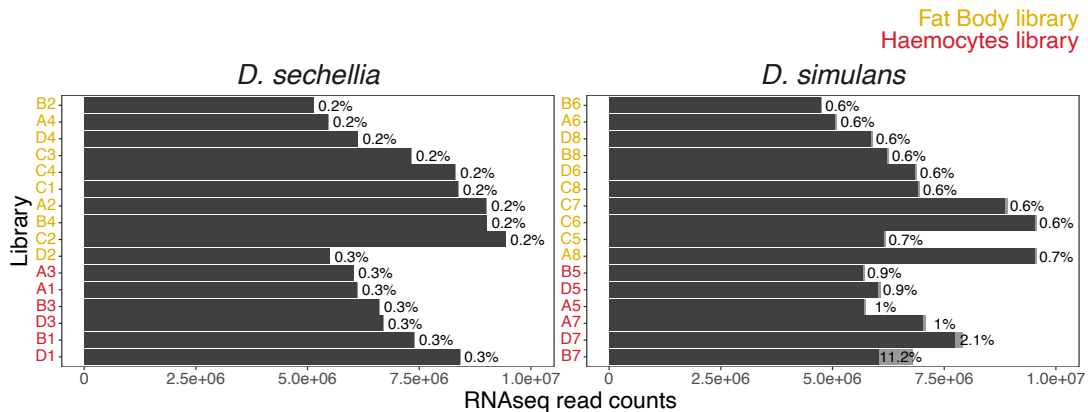

B

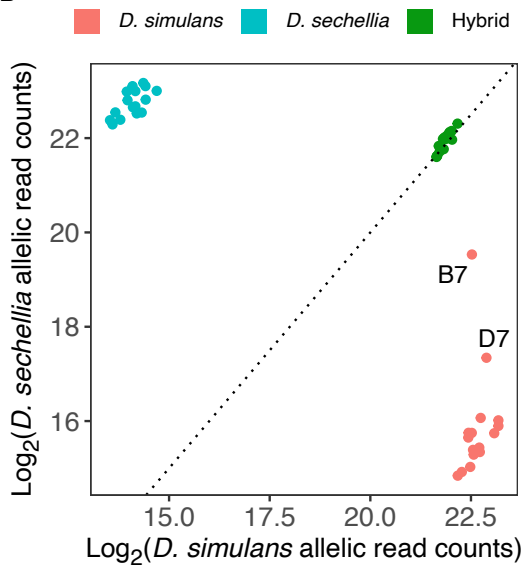

Supplement: pgen.1010453.s015.pdf [file pgen.1010453.s015.pdf]
